# Supplementary material for: Impact of medium-pore zeolite topology on para-xylene production from toluene alkylation with methanol
Source: Royal Society of Chemistry journal article supplement (doi:10.1039/d3cy00557g), 2023-01-01
Supplement: d3cy00557g1.pdf [file d3cy00557g1.pdf]

## Supplementary Information for

# Impact of Medium-Pore Zeolite Topology on Para-Xylene Production from Toluene Alkylation with Methanol

*Deependra Parmar<sup>1</sup>, Seung Hyeok Cha<sup>1,2</sup>, Chenfeng Huang<sup>1</sup>, Hsu Chiang<sup>4</sup>, Seth Washburn<sup>4</sup>, Lars C. Grabow<sup>1,3</sup>, and Jeffrey D. Rimer<sup>1,\*</sup>*

<sup>1</sup> William A. Brookshire Department of Chemical and Biomolecular Engineering, University of Houston, 4226 Martin Luther King Boulevard, Houston, Texas 77204, USA

<sup>2</sup> Green Carbon Research Center, Korea Research Institute of Chemical Technology (KRICT), 141 Gajeongro, Yuseong, Daejeon 34114, Republic of Korea

<sup>3</sup> Texas Center for Superconductivity at the University of Houston, 3369 Cullen Blvd., Houston, TX 77204, USA

<sup>4</sup> ExxonMobil Technology and Engineering, 5200 Bayway Drive, Baytown, Texas 77520, USA

\*Correspondence sent to: [jrimer@central.uh.edu](mailto:jrimer@central.uh.edu)

| <b><u>Table of Contents</u></b> | <b><u>Page</u></b> |
|---------------------------------|--------------------|
| <b>Supporting Tables</b> .....  | 2                  |
| <b>Supporting Figures</b> ..... | 3                  |
| <b>References</b> .....         | 15                 |

### **List of Tables and Figures**

**Table S1:** Structural properties of zeolite catalysts synthesized in this study.

**Table S2:** Acidity determined by pyridine IR for all zeolite catalysts in this study.

**Figure S1:** Reference powder XRD patterns for zeolites in this study.

**Figure S2:** Zeolite frameworks and channel intersections for ZSM-5, TNU-9, and IM-5.

**Figure S3:** Early time on stream data for Figure 4 without MCM-22.

**Figure S4:** Light gas selectivity for medium pore zeolites as a function of feed turnover.

**Figure S5:** Heavy hydrocarbon (C<sub>9+</sub>) selectivity as a function of feed turnover.

**Figure S6:** Total xylene selectivity as a function of feed turnover.

**Figure S7:** Heavy hydrocarbon (C<sub>9+</sub>) and light gas selectivity at 1 atm reaction conditions.

**Figure S8:** Total xylene selectivity as a function of feed turnover at 1 atm.

**Figure S9:** Time-resolved up-take profiles of toluene over ZSM-23, TNU-10, and MCM-22.

**Figure S10:** Time-resolved toluene up-take profiles over ZSM-11, ZSM-5, TNU-9, and IM-5.

**Figure S11:** TGA profiles of spent catalysts ZSM-23, TNU-10, and MCM-22.

**Figure S12:** TGA profiles of spent catalysts ZSM-11, ZSM-5, TNU-9, and IM-5.

## Supporting Tables

**Table S1.** Structural properties of zeolite catalysts synthesized in this study.

| Catalysts | n-D <sup>a</sup> | Channels (Å) <sup>b</sup>                             | Maximum Sphere Diam. (Å) <sup>c</sup> |                  | Connectivity |
|-----------|------------------|-------------------------------------------------------|---------------------------------------|------------------|--------------|
|           |                  |                                                       | That can be included                  | That can diffuse |              |
| ZSM-23    | 1                | 4.5 × 5.2                                             | 6.19                                  | 5.07             | Connected    |
| MCM-22    | 2                | 4.0 × 5.5, 4.1 × 5.1                                  | 9.69                                  | 4.92             | Independent  |
| TNU-10    | 2                | 4.7 × 5.0                                             | 6.29                                  | 4.94             | Connected    |
| ZSM-11    | 3                | 5.4 × 5.3                                             | 7.72                                  | 5.19             | Connected    |
| ZSM-5     | 3                | 5.1 × 5.5, 5.3 × 5.6                                  | 6.36                                  | 4.7              | Connected    |
| TNU-9     | 3                | 5.5 × 5.6, 5.4 × 5.5                                  | 8.46                                  | 5.39             | Connected    |
| IM-5      | 3                | 5.5 × 5.6, 5.3 × 5.4, 5.3 × 5.9, 4.8 × 5.4, 5.1 × 5.3 | 7.34                                  | 5.44             | Connected    |

<sup>a</sup>n-D = n-dimensional channels; Diam. = diameter. <sup>b</sup> channel dimensions. <sup>c</sup> Maximum sphere diameter that can fit in pores. All data was obtained from the International Zeolite Association structure database.<sup>1</sup>

**Table S2.** Acidity determined by pyridine IR for all catalysts studied.

| Catalyst | Acidity (pyridine μmol/g) |          |       |
|----------|---------------------------|----------|-------|
|          | Total                     | Brønsted | Lewis |
| ZSM-23   | 129                       | 112      | 17    |
| TNU-10   | 295                       | 239      | 56    |
| MCM-22   | 310                       | 186      | 124   |
| ZSM-11   | 384                       | 342      | 42    |
| ZSM-5    | 319                       | 253      | 67    |
| TNU-9    | 526                       | 421      | 105   |
| IM-5     | 321                       | 241      | 80    |

## Supporting Figures

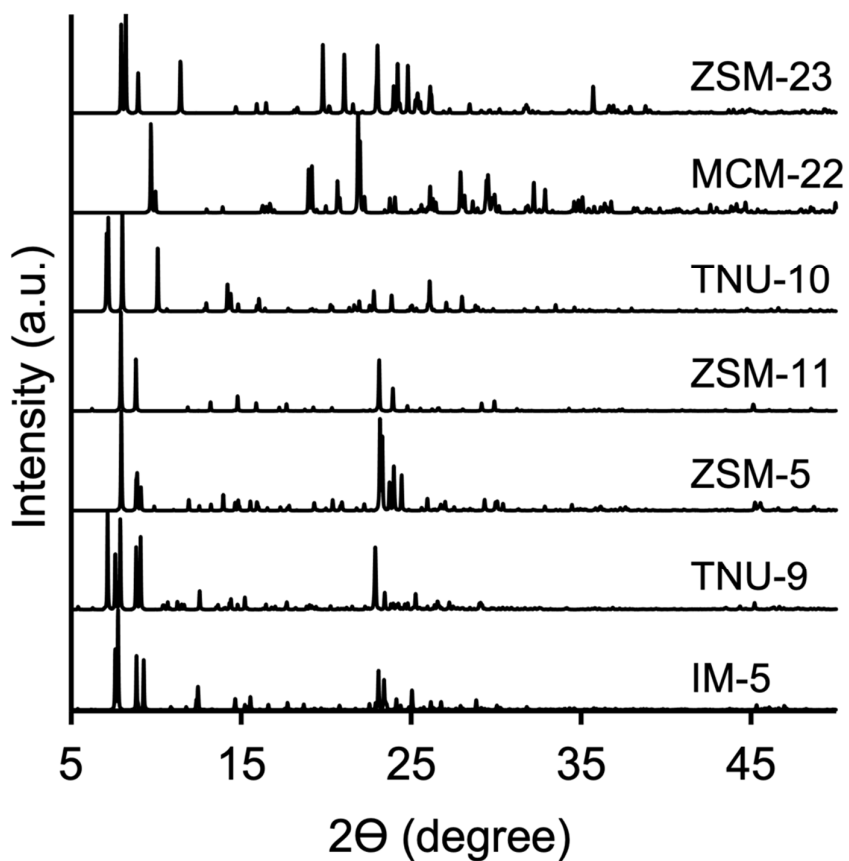

**Figure S1.** Reference X-ray diffraction (XRD) patterns (obtained from IZA database)<sup>1</sup> for zeolites synthesized in this study. ZSM-5 was the only zeolite purchased from a commercial vendor. These XRD patterns are included for comparative purposes with the experimental XRD patterns of as-synthesized zeolites reported in Figure 1A.

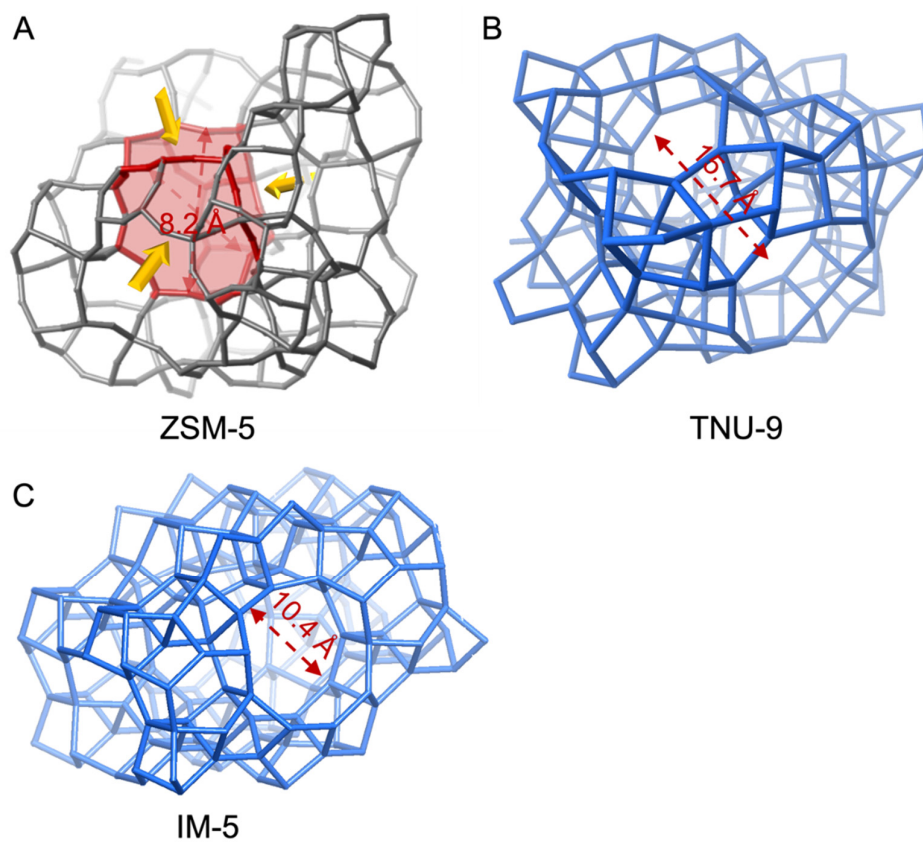

**Figure S2.** Zeolite frameworks and channel intersections for (A) ZSM-5, (B) TNU-9, and (C) IM-5. Average pore dimensions are labeled in each scheme.

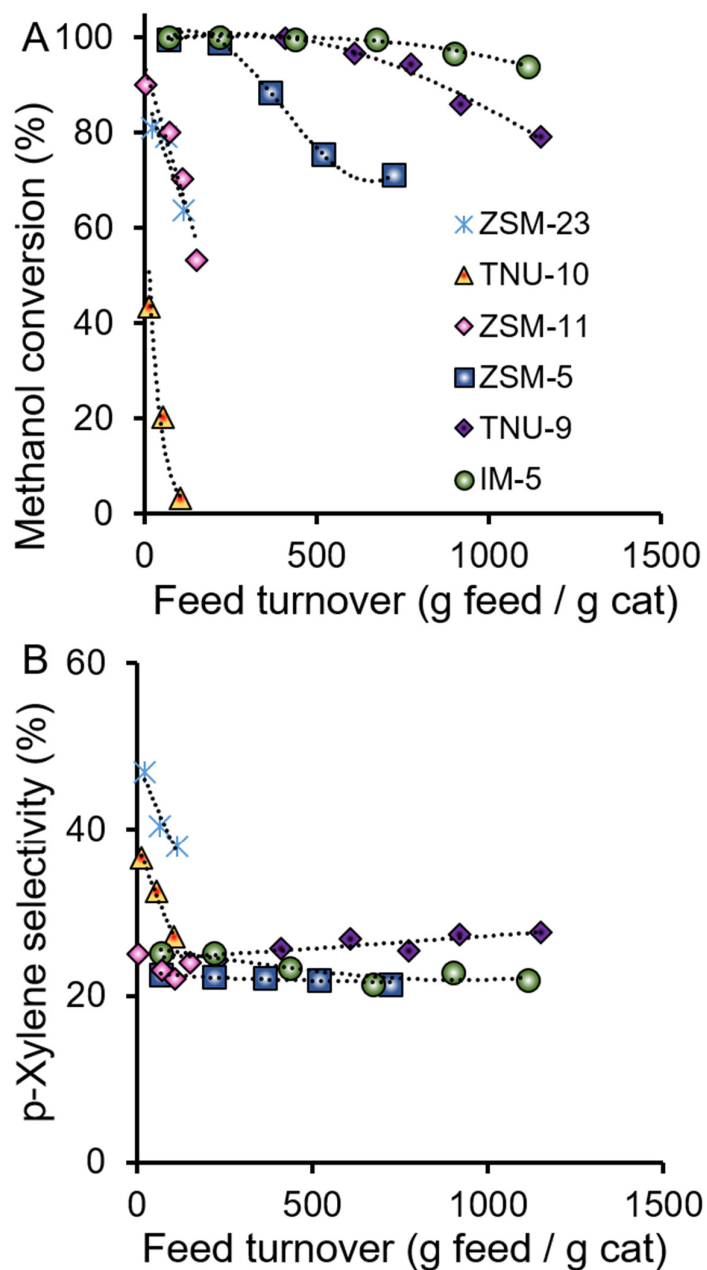

**Figure S3.** Early time on stream data for trends in Figure 4 of the manuscript, plotted without MCM-22 for improved clarity. (A) Methanol conversion and (B) p-xylene selectivity as a function of feed turnover over medium pore zeolites for toluene alkylation of methanol at 350 °C, 41 atm, toluene-to-methanol ratio of 3, and 30 h<sup>-1</sup> WHSV.

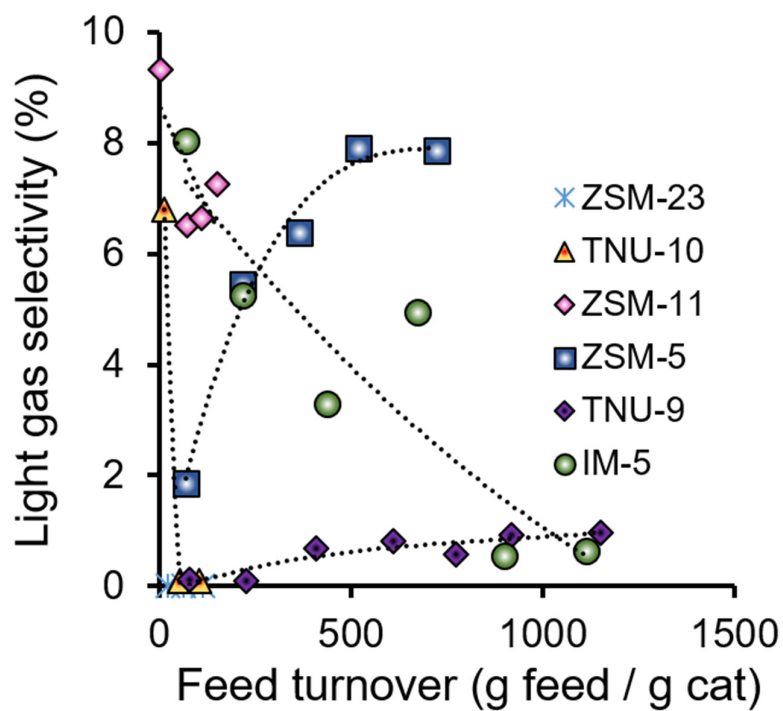

**Figure S4.** Light gas selectivity for medium pore zeolites as a function of feed turnover for toluene alkylation of methanol at 350 °C, 41 atm, toluene-to-methanol ratio of 3, and 30 h<sup>-1</sup> WHSV. The values for MCM-22 equal zero for all feed turnover and are omitted for clarity.

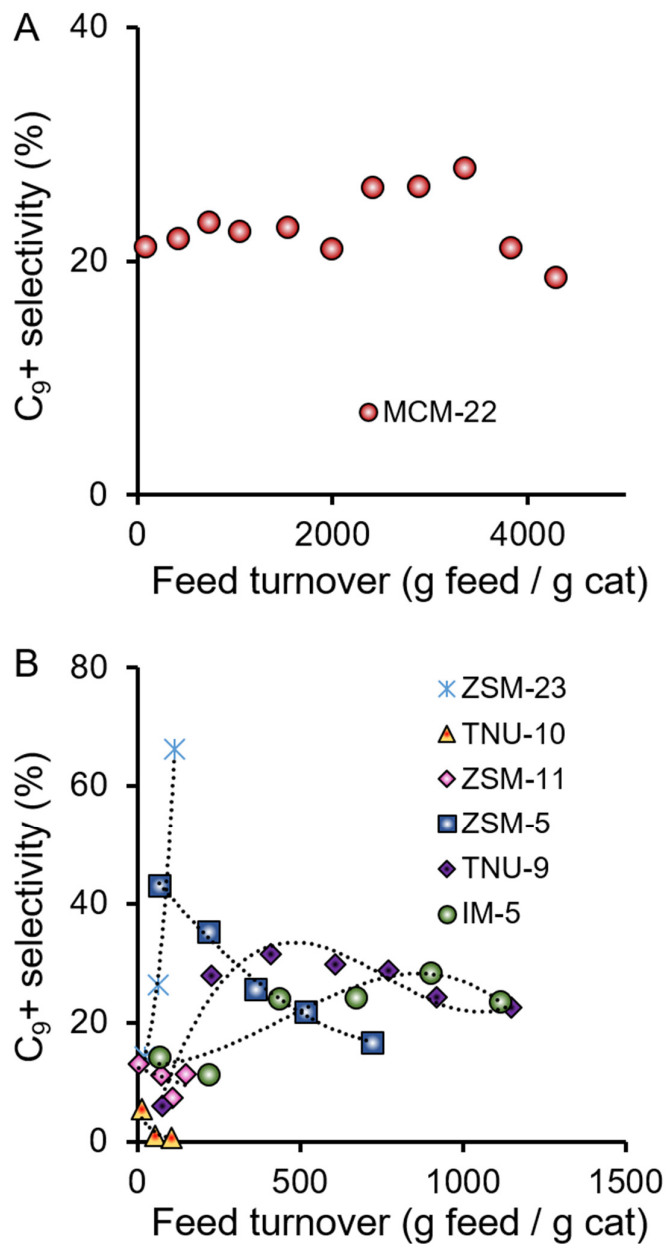

**Figure S5.** Heavy hydrocarbon (C<sub>9</sub>+) selectivity for (A) MCM-22 and (B) other medium pore zeolites as a function of feed turnover for toluene alkylation of methanol at 350 °C, 41 atm, toluene-to-methanol ratio of 3, and 30 h<sup>-1</sup> WHSV. Dashed lines are interpolations to guide the eye.

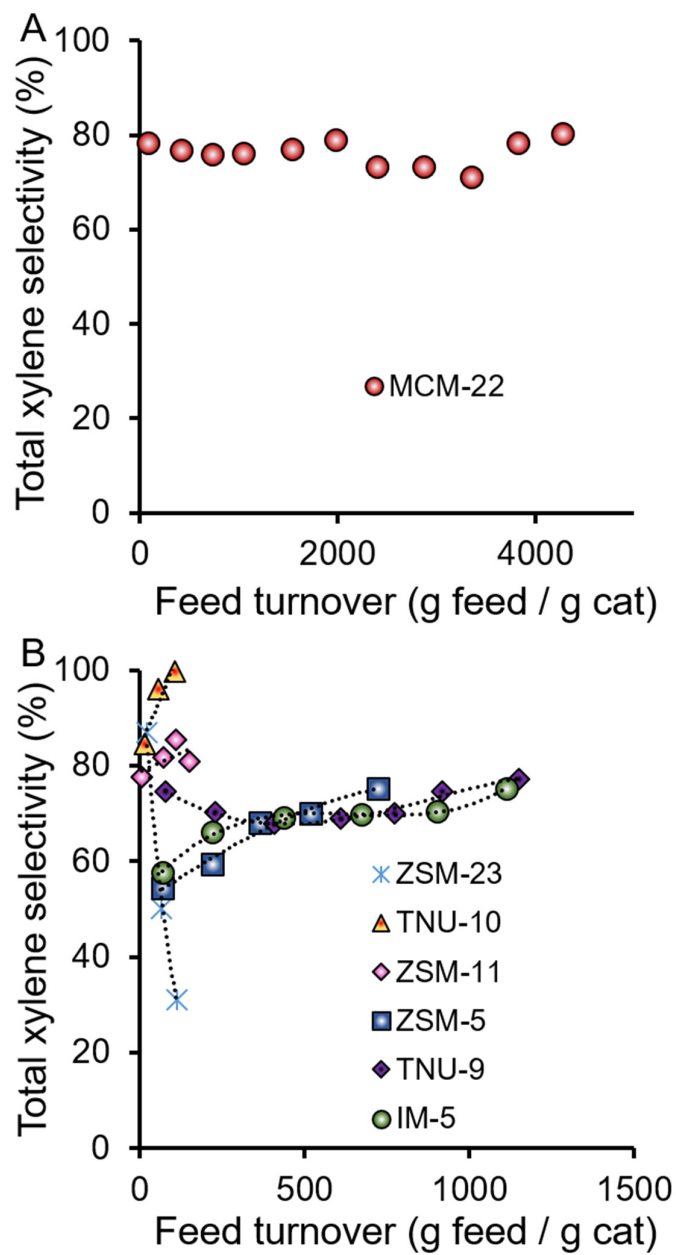

**Figure S6.** Total xylene selectivity for (A) MCM-22 and (B) other medium pore zeolites as a function of feed turnover for toluene alkylation of methanol at 350 °C, 41 atm, toluene-to-methanol ratio of 3, and 30 h<sup>-1</sup> WHSV.



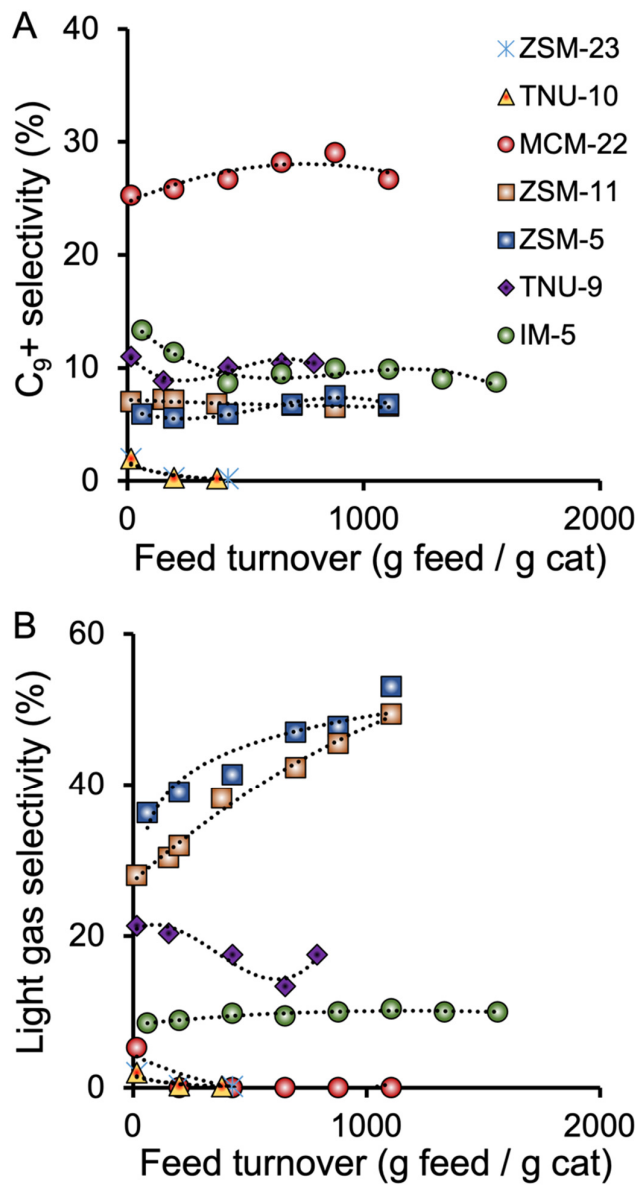

**Figure S7.** (A) Heavy hydrocarbon (C<sub>9</sub>+) and (B) Light gas selectivity as a function of feed turnover over medium pore zeolites for toluene alkylation of methanol at 350 °C, 1 atm, toluene-to-methanol ratio of 3, and 30 h<sup>-1</sup> WHSV.

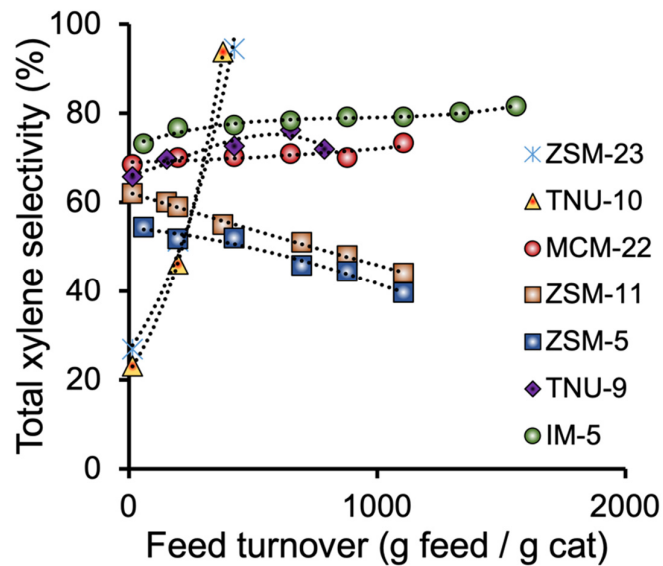

**Figure S8.** Total xylene selectivity as a function of feed turnover over medium pore zeolites for toluene alkylation of methanol at 350 °C, 1 atm, toluene-to-methanol ratio of 3, and 30 h<sup>-1</sup> WHSV.

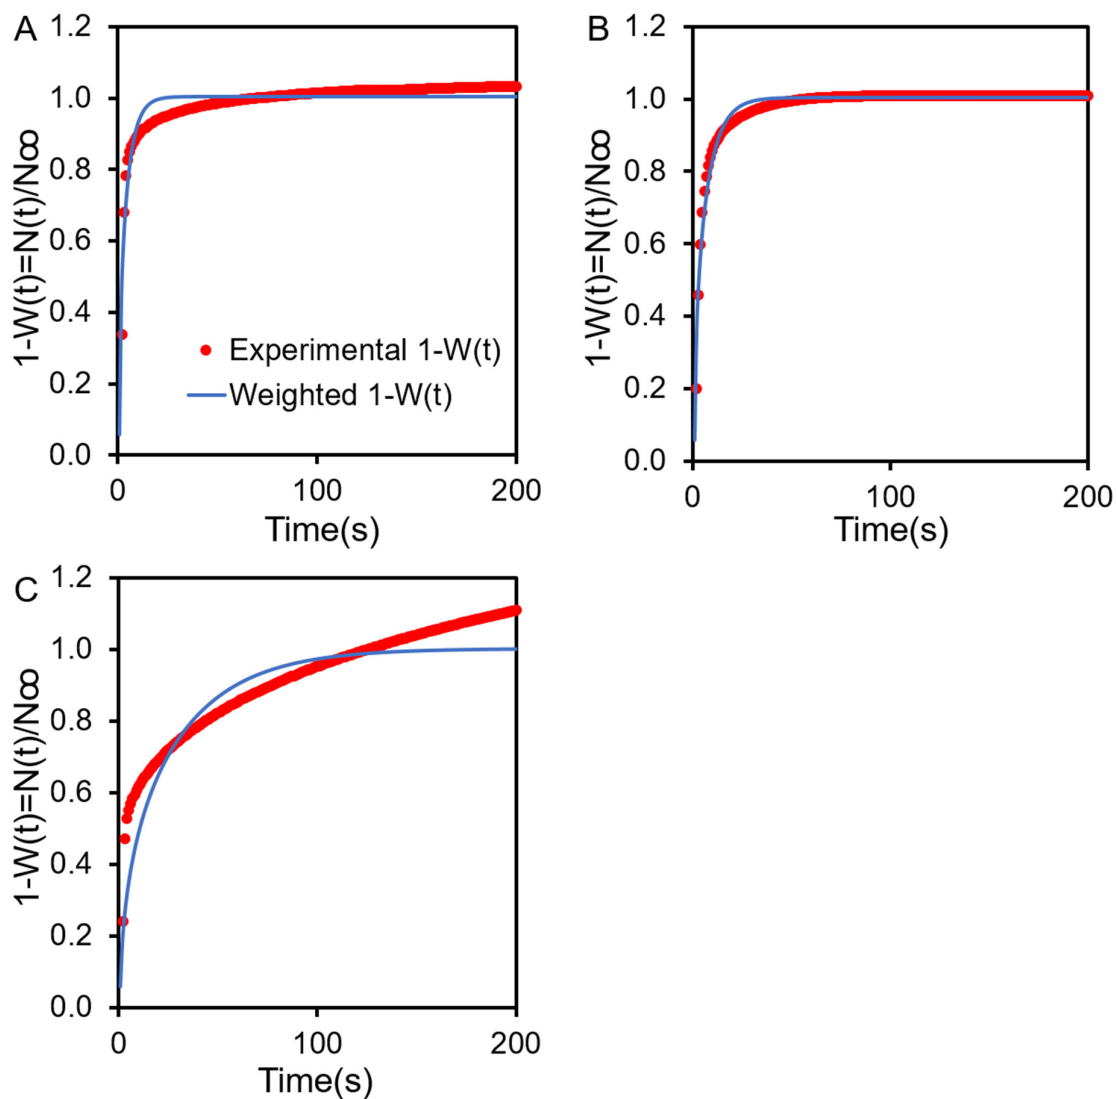

**Figure S9.** Time-resolved up-take profiles of toluene over pelletized zeolites samples of (A) ZSM-23, (B) TNU-10, and (C) MCM-22, to calculate the mass transport parameter  $D/R^2$  where  $D$  is the effective diffusivity and  $R$  is a characteristic dimension of the particles in each sample.

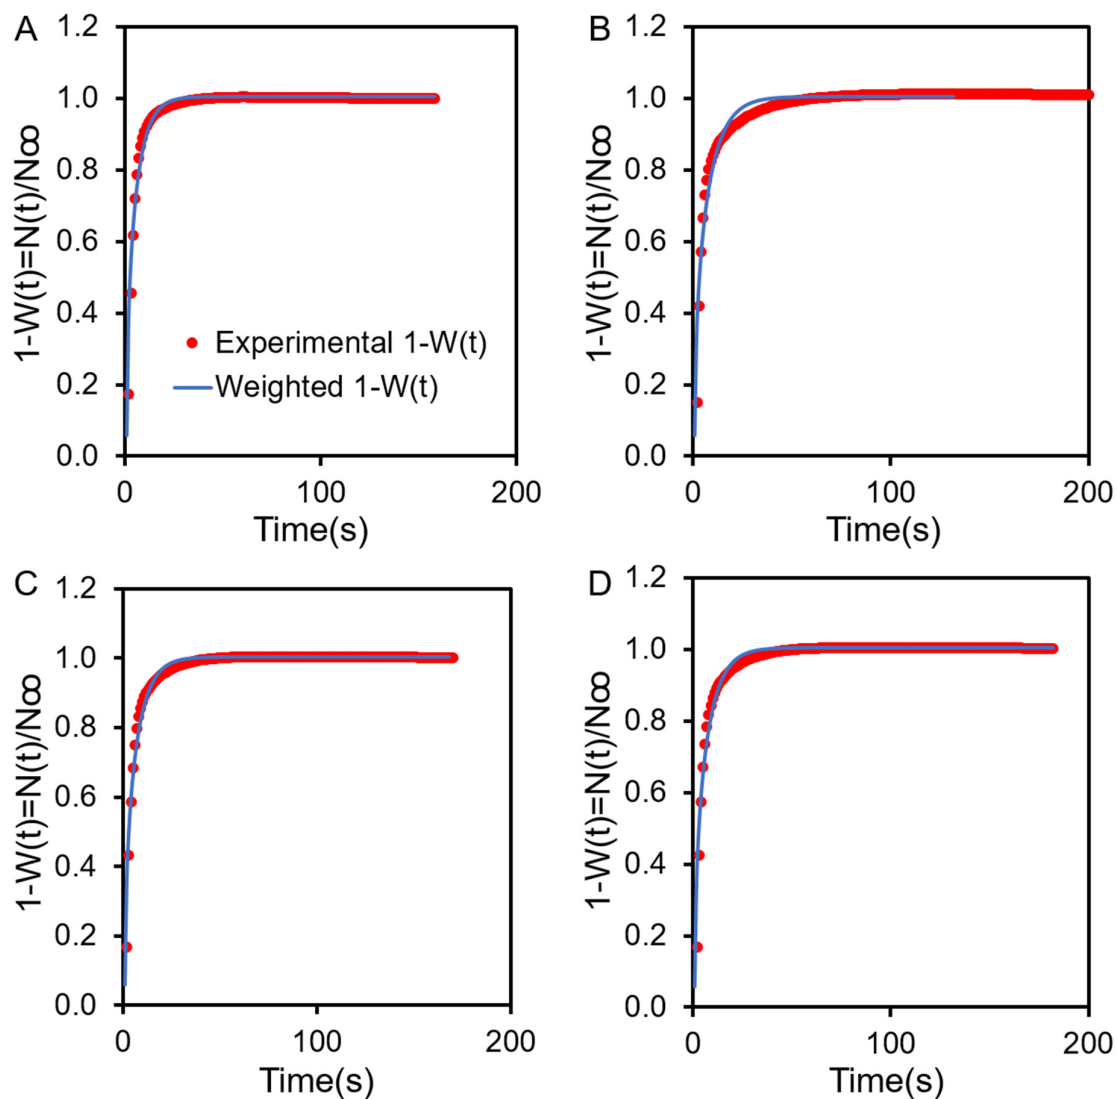

**Figure S10.** Time-resolved up-take profiles of toluene over pelletized zeolites samples of (A) ZSM-11, (B) ZSM-5, (C) TNU-9, and (D) IM-5, to calculate the mass transport parameter  $D/R^2$  where  $D$  is the effective diffusivity and  $R$  is a characteristic dimension of the particles in each sample.

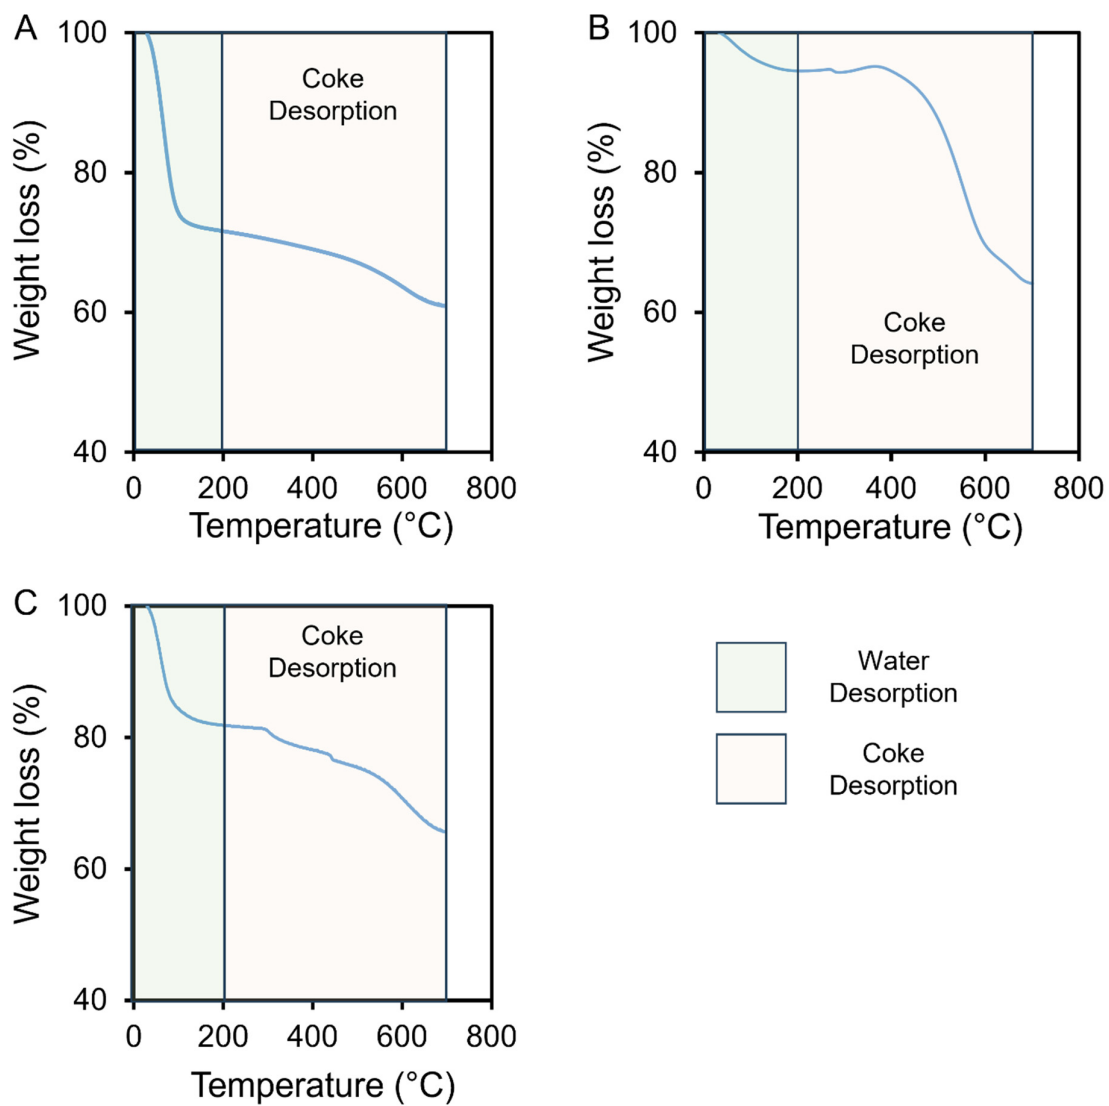

**Figure S11.** Thermo-gravimetric analysis (TGA) profiles of spent catalysts of (A) ZSM-23, (B) TNU-10, and (C) MCM-22 after the toluene alkylation of methanol at 350 °C, 41 atm, toluene-to-methanol ratio of 3, and 30 h<sup>-1</sup> WHSV. Weight loss in the region 0 to 200 °C is attributed to water, while weight loss in the region 200 to 700 °C is due to coke removal.

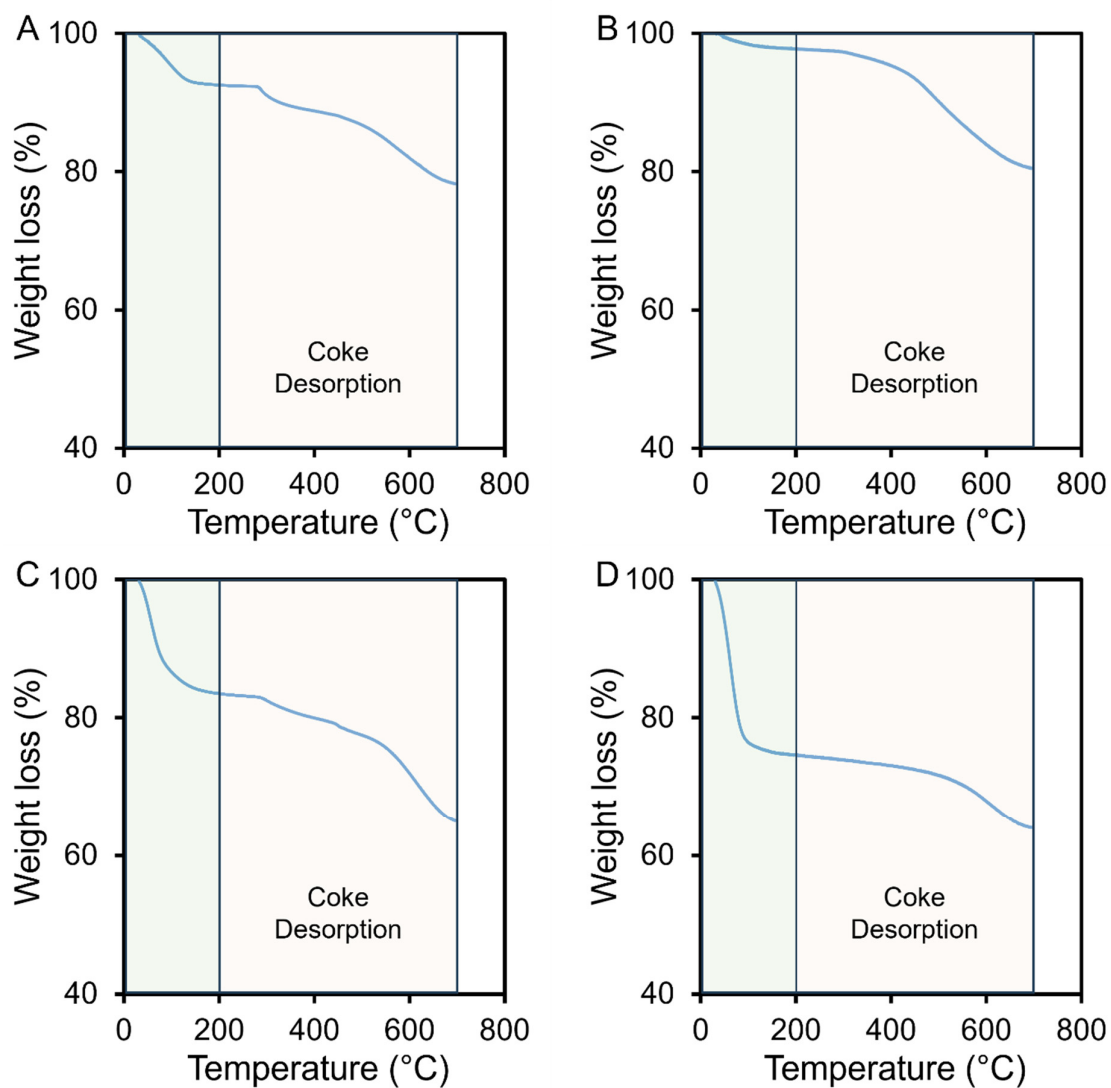

**Figure S12.** Thermo-gravimetric analysis (TGA) profiles of spent catalysts of (A) ZSM-11, (B) ZSM-5, (C) TNU-9, and (D) IM-5 after the toluene alkylation of methanol at 350 °C, 41 atm, toluene-to-methanol ratio of 3, and 30 h<sup>-1</sup> WHSV. Weight loss in the region 0 to 200 °C is attributed to water, while weight loss in the region 200 to 700 °C is due to coke removal.

## References

- 1 Ch, B. & McCusker, L. Database of Zeolite Structures. *[http://www. iza-structure.org/databases](http://www.iza-structure.org/databases)* (2015).
